# Supplementary material for: In vitro and ex vitro propagation of Turkish myrtles through conventional and plantform bioreactor systems
Source: PeerJ. 2023 Sep 18;11:e16061. doi: 10.7717/peerj.16061 (PMC10512933; doi:10.7717/peerj.16061)
Supplement: Data S1 [file peerj-11-16061-s001.xlsx]

## Sheet: Plantform micropropagation
Culture Box	Genotype	BAP Concentrations	Plant Lenght	Multiplication coefficients
Plantform	Erdemli Beyazı	0	11	1
Plantform	Erdemli Beyazı	0	15	2
Plantform	Erdemli Beyazı	0	9	2
Plantform	Erdemli Beyazı	0	8	2
Plantform	Erdemli Beyazı	0	10	1
Plantform	Erdemli Beyazı	0	12	2
Plantform	Erdemli Beyazı	0	10.5	1
Plantform	Erdemli Beyazı	0	6	1
Plantform	Erdemli Beyazı	0	14	1
Plantform	Erdemli Beyazı	0	17	1
Plantform	Erdemli Beyazı	0	7	1
Plantform	Erdemli Beyazı	0	13	2
Plantform	Erdemli Beyazı	0	8	1
Plantform	Erdemli Beyazı	0	5	1
Plantform	Erdemli Beyazı	0	7	1
Plantform	Erdemli Beyazı	0	9.5	1
Plantform	Erdemli Beyazı	0	8.5	1
Plantform	Erdemli Beyazı	0	10	1
Plantform	Erdemli Beyazı	0	10	1
Plantform	Erdemli Beyazı	0	8.5	1
Plantform	Erdemli Beyazı	1	5	18
Plantform	Erdemli Beyazı	1	5	10
Plantform	Erdemli Beyazı	1	4.5	20
Plantform	Erdemli Beyazı	1	4	14
Plantform	Erdemli Beyazı	1	4.5	20
Plantform	Erdemli Beyazı	1	6	25
Plantform	Erdemli Beyazı	1	6.5	9
Plantform	Erdemli Beyazı	1	5.5	13
Plantform	Erdemli Beyazı	1	7	8
Plantform	Erdemli Beyazı	1	7	24
Plantform	Erdemli Beyazı	1	5.5	10
Plantform	Erdemli Beyazı	1	5.5	14
Plantform	Erdemli Beyazı	1	5	30
Plantform	Erdemli Beyazı	1	5.5	8
Plantform	Erdemli Beyazı	1	5.5	6
Plantform	Erdemli Beyazı	1	6.5	18
Plantform	Erdemli Beyazı	1	6.5	20
Plantform	Erdemli Beyazı	1	4.5	10
Plantform	Erdemli Beyazı	1	5.5	8
Plantform	Erdemli Beyazı	1	5.5	9
Plantform	Erdemli Beyazı	2	3	8
Plantform	Erdemli Beyazı	2	6	40
Plantform	Erdemli Beyazı	2	4	5
Plantform	Erdemli Beyazı	2	4	12
Plantform	Erdemli Beyazı	2	4	20
Plantform	Erdemli Beyazı	2	5.5	10
Plantform	Erdemli Beyazı	2	4	30
Plantform	Erdemli Beyazı	2	4	25
Plantform	Erdemli Beyazı	2	4	15
Plantform	Erdemli Beyazı	2	5.5	18
Plantform	Erdemli Beyazı	2	5	20
Plantform	Erdemli Beyazı	2	6	15
Plantform	Erdemli Beyazı	2	4.5	6
Plantform	Erdemli Beyazı	2	5	25
Plantform	Erdemli Beyazı	2	6	15
Plantform	Erdemli Beyazı	2	5	20
Plantform	Erdemli Beyazı	2	5.5	15
Plantform	Erdemli Beyazı	2	6	12
Plantform	Erdemli Beyazı	2	5	8
Plantform	Erdemli Beyazı	2	5.5	9
Plantform	Erdemli Siyahı	0	4.5	1
Plantform	Erdemli Siyahı	0	4.5	1
Plantform	Erdemli Siyahı	0	4.2	1
Plantform	Erdemli Siyahı	0	3.8	1
Plantform	Erdemli Siyahı	0	4.6	1
Plantform	Erdemli Siyahı	0	3	1
Plantform	Erdemli Siyahı	0	4	1
Plantform	Erdemli Siyahı	0	2	1
Plantform	Erdemli Siyahı	0	3.5	1
Plantform	Erdemli Siyahı	0	3.4	1
Plantform	Erdemli Siyahı	0	4.2	1
Plantform	Erdemli Siyahı	0	4.5	1
Plantform	Erdemli Siyahı	0	3.8	1
Plantform	Erdemli Siyahı	0	3.5	1
Plantform	Erdemli Siyahı	0	4	1
Plantform	Erdemli Siyahı	0	4	1
Plantform	Erdemli Siyahı	0	3.8	1
Plantform	Erdemli Siyahı	0	4.2	1
Plantform	Erdemli Siyahı	0	4.5	1
Plantform	Erdemli Siyahı	0	4	1
Plantform	Erdemli Siyahı	1	5	8
Plantform	Erdemli Siyahı	1	6.5	20
Plantform	Erdemli Siyahı	1	4.5	6
Plantform	Erdemli Siyahı	1	4.5	6
Plantform	Erdemli Siyahı	1	5.5	8
Plantform	Erdemli Siyahı	1	4.5	20
Plantform	Erdemli Siyahı	1	6.5	30
Plantform	Erdemli Siyahı	1	6.5	20
Plantform	Erdemli Siyahı	1	7	15
Plantform	Erdemli Siyahı	1	3.5	8
Plantform	Erdemli Siyahı	1	4.5	8
Plantform	Erdemli Siyahı	1	5.5	8
Plantform	Erdemli Siyahı	1	4.5	6
Plantform	Erdemli Siyahı	1	4.5	6
Plantform	Erdemli Siyahı	1	6.5	12
Plantform	Erdemli Siyahı	1	4.5	6
Plantform	Erdemli Siyahı	1	5.5	8
Plantform	Erdemli Siyahı	1	6.5	10
Plantform	Erdemli Siyahı	1	5.5	8
Plantform	Erdemli Siyahı	1	5.5	8
Plantform	Erdemli Siyahı	2	2.5	10
Plantform	Erdemli Siyahı	2	2.5	10
Plantform	Erdemli Siyahı	2	3.5	6
Plantform	Erdemli Siyahı	2	2	3
Plantform	Erdemli Siyahı	2	4.5	6
Plantform	Erdemli Siyahı	2	2	3
Plantform	Erdemli Siyahı	2	4	8
Plantform	Erdemli Siyahı	2	4.5	8
Plantform	Erdemli Siyahı	2	4	5
Plantform	Erdemli Siyahı	2	3	5
Plantform	Erdemli Siyahı	2	4	20
Plantform	Erdemli Siyahı	2	3	8
Plantform	Erdemli Siyahı	2	3	10
Plantform	Erdemli Siyahı	2	3	8
Plantform	Erdemli Siyahı	2	4	10
Plantform	Erdemli Siyahı	2	4.5	12
Plantform	Erdemli Siyahı	2	3	8
Plantform	Erdemli Siyahı	2	3	9
Plantform	Erdemli Siyahı	2	2.5	6
Plantform	Erdemli Siyahı	2	2.5	6
Plantform	Karaisalı Beyazı	0	12	3
Plantform	Karaisalı Beyazı	0	5	1
Plantform	Karaisalı Beyazı	0	5	1
Plantform	Karaisalı Beyazı	0	7.5	1
Plantform	Karaisalı Beyazı	0	12	1
Plantform	Karaisalı Beyazı	0	11	1
Plantform	Karaisalı Beyazı	0	12	1
Plantform	Karaisalı Beyazı	0	10	1
Plantform	Karaisalı Beyazı	0	7.5	2
Plantform	Karaisalı Beyazı	0	6	1
Plantform	Karaisalı Beyazı	0	6.5	1
Plantform	Karaisalı Beyazı	0	5	2
Plantform	Karaisalı Beyazı	0	12.5	1
Plantform	Karaisalı Beyazı	0	8	1
Plantform	Karaisalı Beyazı	0	10	1
Plantform	Karaisalı Beyazı	0	7	1
Plantform	Karaisalı Beyazı	0	7	1
Plantform	Karaisalı Beyazı	0	7	1
Plantform	Karaisalı Beyazı	0	7	1
Plantform	Karaisalı Beyazı	0	9	1
Plantform	Karaisalı Beyazı	1	7	10
Plantform	Karaisalı Beyazı	1	5.5	10
Plantform	Karaisalı Beyazı	1	4.5	7
Plantform	Karaisalı Beyazı	1	5.5	14
Plantform	Karaisalı Beyazı	1	5	18
Plantform	Karaisalı Beyazı	1	5	14
Plantform	Karaisalı Beyazı	1	4	12
Plantform	Karaisalı Beyazı	1	5.5	11
Plantform	Karaisalı Beyazı	1	6.5	18
Plantform	Karaisalı Beyazı	1	3.5	10
Plantform	Karaisalı Beyazı	1	5.5	13
Plantform	Karaisalı Beyazı	1	6	18
Plantform	Karaisalı Beyazı	1	5.5	12
Plantform	Karaisalı Beyazı	1	4	20
Plantform	Karaisalı Beyazı	1	6	10
Plantform	Karaisalı Beyazı	1	6	30
Plantform	Karaisalı Beyazı	1	6.5	10
Plantform	Karaisalı Beyazı	1	5	21
Plantform	Karaisalı Beyazı	1	4	13
Plantform	Karaisalı Beyazı	1	6	13
Plantform	Karaisalı Beyazı	2	4	20
Plantform	Karaisalı Beyazı	2	6	35
Plantform	Karaisalı Beyazı	2	3.5	9
Plantform	Karaisalı Beyazı	2	4.5	30
Plantform	Karaisalı Beyazı	2	4.5	12
Plantform	Karaisalı Beyazı	2	4	13
Plantform	Karaisalı Beyazı	2	4	8
Plantform	Karaisalı Beyazı	2	4.5	8
Plantform	Karaisalı Beyazı	2	6	10
Plantform	Karaisalı Beyazı	2	3.5	3
Plantform	Karaisalı Beyazı	2	2.5	3
Plantform	Karaisalı Beyazı	2	3.5	5
Plantform	Karaisalı Beyazı	2	5	12
Plantform	Karaisalı Beyazı	2	8	8
Plantform	Karaisalı Beyazı	2	4	10
Plantform	Karaisalı Beyazı	2	3	7
Plantform	Karaisalı Beyazı	2	4	8
Plantform	Karaisalı Beyazı	2	4	8
Plantform	Karaisalı Beyazı	2	4	8
Plantform	Karaisalı Beyazı	2	4	8
Plantform	Karaisalı Siyahı	0	8.5	1
Plantform	Karaisalı Siyahı	0	11.5	2
Plantform	Karaisalı Siyahı	0	6.5	1
Plantform	Karaisalı Siyahı	0	7	1
Plantform	Karaisalı Siyahı	0	7.5	3
Plantform	Karaisalı Siyahı	0	11	1
Plantform	Karaisalı Siyahı	0	12	1
Plantform	Karaisalı Siyahı	0	14.5	2
Plantform	Karaisalı Siyahı	0	15	1
Plantform	Karaisalı Siyahı	0	11.5	1
Plantform	Karaisalı Siyahı	0	12.5	1
Plantform	Karaisalı Siyahı	0	10	2
Plantform	Karaisalı Siyahı	0	9.5	1
Plantform	Karaisalı Siyahı	0	14	2
Plantform	Karaisalı Siyahı	0	5	1
Plantform	Karaisalı Siyahı	0	13.5	3
Plantform	Karaisalı Siyahı	0	12.5	4
Plantform	Karaisalı Siyahı	0	9	1
Plantform	Karaisalı Siyahı	0	13	1
Plantform	Karaisalı Siyahı	0	7	1
Plantform	Karaisalı Siyahı	1	6	12
Plantform	Karaisalı Siyahı	1	6	20
Plantform	Karaisalı Siyahı	1	4.5	11
Plantform	Karaisalı Siyahı	1	6	12
Plantform	Karaisalı Siyahı	1	7.5	25
Plantform	Karaisalı Siyahı	1	2.5	6
Plantform	Karaisalı Siyahı	1	6.5	25
Plantform	Karaisalı Siyahı	1	6.5	25
Plantform	Karaisalı Siyahı	1	6.5	9
Plantform	Karaisalı Siyahı	1	7	13
Plantform	Karaisalı Siyahı	1	5.5	16
Plantform	Karaisalı Siyahı	1	7	32
Plantform	Karaisalı Siyahı	1	3	15
Plantform	Karaisalı Siyahı	1	6.5	12
Plantform	Karaisalı Siyahı	1	7.5	12
Plantform	Karaisalı Siyahı	1	5.5	7
Plantform	Karaisalı Siyahı	1	3	7
Plantform	Karaisalı Siyahı	1	4.5	6
Plantform	Karaisalı Siyahı	1	6.5	18
Plantform	Karaisalı Siyahı	1	6.5	20
Plantform	Karaisalı Siyahı	2	3.5	3
Plantform	Karaisalı Siyahı	2	4.5	16
Plantform	Karaisalı Siyahı	2	6	16
Plantform	Karaisalı Siyahı	2	6	25
Plantform	Karaisalı Siyahı	2	6	13
Plantform	Karaisalı Siyahı	2	4.5	5
Plantform	Karaisalı Siyahı	2	5	12
Plantform	Karaisalı Siyahı	2	4	6
Plantform	Karaisalı Siyahı	2	3	12
Plantform	Karaisalı Siyahı	2	4.5	22
Plantform	Karaisalı Siyahı	2	5	20
Plantform	Karaisalı Siyahı	2	3.5	8
Plantform	Karaisalı Siyahı	2	3	6
Plantform	Karaisalı Siyahı	2	3.5	4
Plantform	Karaisalı Siyahı	2	3	5
Plantform	Karaisalı Siyahı	2	3	5
Plantform	Karaisalı Siyahı	2	6	10
Plantform	Karaisalı Siyahı	2	3	5
Plantform	Karaisalı Siyahı	2	3	5
Plantform	Karaisalı Siyahı	2	3	5
Katı Kültür	Tarsus Beyazı	0	2.33333	1
Katı Kültür	Tarsus Beyazı	0	3.1	2.33333
Katı Kültür	Tarsus Beyazı	0	4.1	1.33333
Katı Kültür	Tarsus Beyazı	0	2.5	1
Katı Kültür	Tarsus Beyazı	0	4.16667	1
Katı Kültür	Tarsus Beyazı	0	3.66667	1
Katı Kültür	Tarsus Beyazı	0	3.26667	1
Katı Kültür	Tarsus Beyazı	0	3.7	1
Katı Kültür	Tarsus Beyazı	0	3.66667	1
Katı Kültür	Tarsus Beyazı	0	2.76667	1
Katı Kültür	Tarsus Beyazı	1	2.63333	5.33333
Katı Kültür	Tarsus Beyazı	1	2.4	7.33333
Katı Kültür	Tarsus Beyazı	1	3.33333	5.43333
Katı Kültür	Tarsus Beyazı	1	3.06667	3.66667
Katı Kültür	Tarsus Beyazı	1	3.76667	3.33333
Katı Kültür	Tarsus Beyazı	1	3.66667	9.66667
Katı Kültür	Tarsus Beyazı	1	2.7	3
Katı Kültür	Tarsus Beyazı	1	3.33333	3.33333
Katı Kültür	Tarsus Beyazı	1	3.36667	9
Katı Kültür	Tarsus Beyazı	1	2.46667	5.66667
Katı Kültür	Tarsus Beyazı	2	3	3.33333
Katı Kültür	Tarsus Beyazı	2	2.73333	2.33333
Katı Kültür	Tarsus Beyazı	2	3.2	5.33333
Katı Kültür	Tarsus Beyazı	2	1.93333	3.66667
Katı Kültür	Tarsus Beyazı	2	3	1
Katı Kültür	Tarsus Beyazı	2	3.4	5.66667
Katı Kültür	Tarsus Beyazı	2	3.26667	3.33333
Katı Kültür	Tarsus Beyazı	2	1.73333	3
Katı Kültür	Tarsus Beyazı	2	3.16667	4.66667
Katı Kültür	Tarsus Beyazı	2	3	4.3
Katı Kültür	Tarsus Siyahı	0	3.1	1.33333
Katı Kültür	Tarsus Siyahı	0	1.4	1
Katı Kültür	Tarsus Siyahı	0	1.83333	1
Katı Kültür	Tarsus Siyahı	0	1.43333	1
Katı Kültür	Tarsus Siyahı	0	2.03333	1
Katı Kültür	Tarsus Siyahı	0	2.33333	1
Katı Kültür	Tarsus Siyahı	0	1	1
Katı Kültür	Tarsus Siyahı	0	1.5	1.33333
Katı Kültür	Tarsus Siyahı	0	1.23333	1
Katı Kültür	Tarsus Siyahı	0	1.16667	1.33333
Katı Kültür	Tarsus Siyahı	1	2.43333	5.66667
Katı Kültür	Tarsus Siyahı	1	3.23333	3.33333
Katı Kültür	Tarsus Siyahı	1	1.66667	7.33333
Katı Kültür	Tarsus Siyahı	1	4	5
Katı Kültür	Tarsus Siyahı	1	1.33333	7.66667
Katı Kültür	Tarsus Siyahı	1	1.8	6.33333
Katı Kültür	Tarsus Siyahı	1	1.9	3.66667
Katı Kültür	Tarsus Siyahı	1	2.26667	4.66667
Katı Kültür	Tarsus Siyahı	1	1.9	2.66667
Katı Kültür	Tarsus Siyahı	1	1.53333	4.66667
Katı Kültür	Tarsus Siyahı	1	2.03333	3.66667
Katı Kültür	Tarsus Siyahı	1	1.73333	4
Katı Kültür	Tarsus Siyahı	1	2.3	9
Katı Kültür	Tarsus Siyahı	1	2.3	7.33333
Katı Kültür	Tarsus Siyahı	1	1.9	10
Katı Kültür	Tarsus Siyahı	1	1.76667	6.66667
Katı Kültür	Tarsus Siyahı	1	2.16667	5.66667
Katı Kültür	Tarsus Siyahı	1	1.4	6.33333
Katı Kültür	Tarsus Siyahı	1	2.26667	3.33333
Katı Kültür	Tarsus Siyahı	1	2.33333	5.33333
Katı Kültür	Tarsus Siyahı	1	1.16667	9.33333
Katı Kültür	Tarsus Siyahı	2	2.4	6.66667
Katı Kültür	Tarsus Siyahı	2	1.7	8.33333
Katı Kültür	Tarsus Siyahı	2	4.4	11.6667
Katı Kültür	Tarsus Siyahı	2	3.66667	9
Katı Kültür	Tarsus Siyahı	2	5.4	5.33333
Katı Kültür	Tarsus Siyahı	2	2.66667	10.6667
Katı Kültür	Tarsus Siyahı	2	2.66667	11
Katı Kültür	Tarsus Siyahı	2	3.56667	8.33333
Katı Kültür	Tarsus Siyahı	2	4.16667	9.33333
Katı Kültür	Tarsus Siyahı	2	2.5	10
Katı Kültür	Tarsus Siyahı	2	4.5	9.33333
Katı Kültür	Tarsus Siyahı	2	2.5	7.33333
Katı Kültür	Tarsus Siyahı	2	2.66667	11
Katı Kültür	Tarsus Siyahı	2	4	11
Katı Kültür	Tarsus Siyahı	2	2.06667	10.6667
Katı Kültür	Tarsus Siyahı	2	3.16667	8.66667
Katı Kültür	Tarsus Siyahı	2	3.5	8.33333
Katı Kültür	Tarsus Siyahı	2	2.76667	7
Katı Kültür	Tarsus Siyahı	2	2.33333	11.6667
Katı Kültür	Tarsus Siyahı	2	2.5	15.6667
Katı Kültür	Tarsus Siyahı	2	3.5	7.33333
Katı Kültür	Tarsus Siyahı	2	3.5	12.6667
Katı Kültür	Tarsus Siyahı	2	3.5	7.66667
Katı Kültür	Tarsus Siyahı	2	2.66667	6
Katı Kültür	Tarsus Siyahı	2	3.36667	14.6667
Katı Kültür	Tarsus Siyahı	2	2.96667	11.3333
Katı Kültür	Erdemli Beyazı	0	0.2	1
Katı Kültür	Erdemli Beyazı	0	0.2	1
Katı Kültür	Erdemli Beyazı	0	0.2	1
Katı Kültür	Erdemli Beyazı	0	0.3	1
Katı Kültür	Erdemli Beyazı	0	0.2	1
Katı Kültür	Erdemli Beyazı	0	0.2	1
Katı Kültür	Erdemli Beyazı	0	0.4	1
Katı Kültür	Erdemli Beyazı	0	0.2	1
Katı Kültür	Erdemli Beyazı	0	0.5	1
Katı Kültür	Erdemli Beyazı	0	0.2	1
Katı Kültür	Erdemli Beyazı	1	2.16667	2.33333
Katı Kültür	Erdemli Beyazı	1	1.9	2.66667
Katı Kültür	Erdemli Beyazı	1	2	2.33333
Katı Kültür	Erdemli Beyazı	1	1.66667	2.33333
Katı Kültür	Erdemli Beyazı	1	2	1
Katı Kültür	Erdemli Beyazı	1	1.36667	3
Katı Kültür	Erdemli Beyazı	1	1.56667	1.33333
Katı Kültür	Erdemli Beyazı	1	1.3	2.66667
Katı Kültür	Erdemli Beyazı	1	0.833333	1.66667
Katı Kültür	Erdemli Beyazı	1	1.16667	1.33333
Katı Kültür	Erdemli Beyazı	2	2.16667	5
Katı Kültür	Erdemli Beyazı	2	2	9.66667
Katı Kültür	Erdemli Beyazı	2	2.1	4.66667
Katı Kültür	Erdemli Beyazı	2	2.23333	6
Katı Kültür	Erdemli Beyazı	2	1.33333	4.66667
Katı Kültür	Erdemli Beyazı	2	2	1.66667
Katı Kültür	Erdemli Beyazı	2	1	4.66667
Katı Kültür	Erdemli Beyazı	2	1.16667	2.33333
Katı Kültür	Erdemli Beyazı	2	1.56667	4.33333
Katı Kültür	Erdemli Beyazı	2	1.83333	3.66667
Katı Kültür	Erdemli Siyahı	0	1.5	1
Katı Kültür	Erdemli Siyahı	0	1.5	1
Katı Kültür	Erdemli Siyahı	0	1.6	1
Katı Kültür	Erdemli Siyahı	0	1.5	1
Katı Kültür	Erdemli Siyahı	0	0.3	1
Katı Kültür	Erdemli Siyahı	1	1.76667	2
Katı Kültür	Erdemli Siyahı	1	2.33333	10.3333
Katı Kültür	Erdemli Siyahı	1	2.33333	5.66667
Katı Kültür	Erdemli Siyahı	1	2.26667	4.33333
Katı Kültür	Erdemli Siyahı	1	2	4
Katı Kültür	Erdemli Siyahı	1	1.66667	2
Katı Kültür	Erdemli Siyahı	1	2.33333	1.66667
Katı Kültür	Erdemli Siyahı	1	2.26667	5
Katı Kültür	Erdemli Siyahı	1	1.8	2.33333
Katı Kültür	Erdemli Siyahı	1	2.1	1.66667
Katı Kültür	Erdemli Siyahı	1	1.33333	3.66667
Katı Kültür	Erdemli Siyahı	2	1.23333	4.33333
Katı Kültür	Erdemli Siyahı	2	1.13333	3.33333
Katı Kültür	Erdemli Siyahı	2	1.4	5
Katı Kültür	Erdemli Siyahı	2	1.4	6.33333
Katı Kültür	Erdemli Siyahı	2	1.8	7
Katı Kültür	Erdemli Siyahı	2	2.16667	7.33333
Katı Kültür	Erdemli Siyahı	2	1.16667	2.33333
Katı Kültür	Erdemli Siyahı	2	1.5	5
Katı Kültür	Erdemli Siyahı	2	1.33333	3
Katı Kültür	Erdemli Siyahı	2	1.06667	6.33333
Katı Kültür	Erdemli Siyahı	2	1.16667	4
Katı Kültür	Erdemli Siyahı	2	1	7
Katı Kültür	Karaisalı Beyazı	0	0.5	1
Katı Kültür	Karaisalı Beyazı	0	0.5	1
Katı Kültür	Karaisalı Beyazı	1	0.5	1
Katı Kültür	Karaisalı Beyazı	1	1.5	1
Katı Kültür	Karaisalı Beyazı	1	0.5	1
Katı Kültür	Karaisalı Beyazı	1	1.5	1
Katı Kültür	Karaisalı Beyazı	1	0.5	1
Katı Kültür	Karaisalı Beyazı	2	1.1	4
Katı Kültür	Karaisalı Beyazı	2	1.16667	3.33333
Katı Kültür	Karaisalı Beyazı	2	1.26667	2.66667
Katı Kültür	Karaisalı Beyazı	2	1.83333	4.33333
Katı Kültür	Karaisalı Beyazı	2	1.16667	1.66667
Katı Kültür	Karaisalı Beyazı	2	1.43333	2.66667
Katı Kültür	Karaisalı Beyazı	2	1.5	6
Katı Kültür	Karaisalı Beyazı	2	1.5	5.66667
Katı Kültür	Karaisalı Beyazı	2	1.23333	2
Katı Kültür	Karaisalı Beyazı	2	1.66667	3.33333
Katı Kültür	Karaisalı Beyazı	2	1.93333	3.33333
Katı Kültür	Karaisalı Beyazı	2	1.66667	3
Katı Kültür	Karaisalı Beyazı	2	1.93333	2.66667
Katı Kültür	Karaisalı Beyazı	2	1.33333	2.33333
Katı Kültür	Karaisalı Beyazı	2	1.4	1.66667
Katı Kültür	Karaisalı Beyazı	2	1.83333	3.33333
Katı Kültür	Karaisalı Siyahı	0	1.2	1
Katı Kültür	Karaisalı Siyahı	0	1.2	1
Katı Kültür	Karaisalı Siyahı	0	2	1
Katı Kültür	Karaisalı Siyahı	0	2.5	1
Katı Kültür	Karaisalı Siyahı	0	1	1
Katı Kültür	Karaisalı Siyahı	0	1	1
Katı Kültür	Karaisalı Siyahı	0	1	1
Katı Kültür	Karaisalı Siyahı	0	0.3	1
Katı Kültür	Karaisalı Siyahı	0	0.5	1
Katı Kültür	Karaisalı Siyahı	0	1.8	1
Katı Kültür	Karaisalı Siyahı	1	1.75	6.5
Katı Kültür	Karaisalı Siyahı	1	2.35	4.5
Katı Kültür	Karaisalı Siyahı	1	1.4	4.5
Katı Kültür	Karaisalı Siyahı	1	1.5	2.5
Katı Kültür	Karaisalı Siyahı	1	1.5	2.5
Katı Kültür	Karaisalı Siyahı	1	1.75	4.5
Katı Kültür	Karaisalı Siyahı	1	1.6	2.5
Katı Kültür	Karaisalı Siyahı	1	1.7	1.5
Katı Kültür	Karaisalı Siyahı	1	1.5	1.5
Katı Kültür	Karaisalı Siyahı	1	1.05	3
Katı Kültür	Karaisalı Siyahı	1	1	1.5
Katı Kültür	Karaisalı Siyahı	1	1.7	2.5
Katı Kültür	Karaisalı Siyahı	1	1.55	2.5
Katı Kültür	Karaisalı Siyahı	1	1.65	2
Katı Kültür	Karaisalı Siyahı	1	1.85	3.5
Katı Kültür	Karaisalı Siyahı	1	1.5	3
Katı Kültür	Karaisalı Siyahı	1	0.65	1.5
Katı Kültür	Karaisalı Siyahı	1	1.25	1.5
Katı Kültür	Karaisalı Siyahı	1	1.25	2.5
Katı Kültür	Karaisalı Siyahı	1	1.15	2.5
Katı Kültür	Karaisalı Siyahı	1	1.65	2.5
Katı Kültür	Karaisalı Siyahı	1	1.4	2.5
Katı Kültür	Karaisalı Siyahı	1	1.3	2
Katı Kültür	Karaisalı Siyahı	1	2	3.5
Katı Kültür	Karaisalı Siyahı	1	1.25	1
Katı Kültür	Karaisalı Siyahı	1	1	1.5
Katı Kültür	Karaisalı Siyahı	2	2.75	1.5
Katı Kültür	Karaisalı Siyahı	2	1.85	8
Katı Kültür	Karaisalı Siyahı	2	2.15	5.5
Katı Kültür	Karaisalı Siyahı	2	1.75	3.5
Katı Kültür	Karaisalı Siyahı	2	1	4
Katı Kültür	Karaisalı Siyahı	2	1.65	3
Katı Kültür	Karaisalı Siyahı	2	1.85	5
Katı Kültür	Karaisalı Siyahı	2	1.25	4
Katı Kültür	Karaisalı Siyahı	2	1	1.5
Katı Kültür	Karaisalı Siyahı	2	1.25	3.5
Katı Kültür	Karaisalı Siyahı	2	1.6	3.5
Katı Kültür	Karaisalı Siyahı	2	2	9.5
Katı Kültür	Karaisalı Siyahı	2	2.25	8
Katı Kültür	Karaisalı Siyahı	2	2.5	9
Katı Kültür	Karaisalı Siyahı	2	1.6	5.5
Katı Kültür	Karaisalı Siyahı	2	1.65	8
Katı Kültür	Karaisalı Siyahı	2	1.75	7.5
Katı Kültür	Karaisalı Siyahı	2	1.25	6.5
Katı Kültür	Karaisalı Siyahı	2	2.25	12.5
Katı Kültür	Karaisalı Siyahı	2	2.25	5
Katı Kültür	Karaisalı Siyahı	2	1.25	4
Katı Kültür	Karaisalı Siyahı	2	1.6	1.5
Katı Kültür	Karaisalı Siyahı	2	1.6	5.5
Katı Kültür	Karaisalı Siyahı	2	1.5	3
Katı Kültür	Karaisalı Siyahı	2	2.15	3.5
Katı Kültür	Karaisalı Siyahı	2	1.7	3

## Sheet: Plantform rooting
Genotype	IBA concentrations	Plant length	Root number	Root length	Rooting rate	Rooting rate tranformation
Erdemli Beyazı	0	8	0	0	5	12.9211
Erdemli Beyazı	0	5	0	0	10	18.4351
Erdemli Beyazı	0	4	0	0	0	0
Erdemli Beyazı	0	6	0	0	5	12.9211
Erdemli Beyazı	0	4.5	0	0	6	14.179
Erdemli Beyazı	0	8	0	0	5	12.9211
Erdemli Beyazı	0	3	0	0	4	11.5371
Erdemli Beyazı	0	5.5	0	0	5	12.9211
Erdemli Beyazı	0	2	0	0	6	14.179
Erdemli Beyazı	0	7	2	3	6	14.179
Erdemli Beyazı	1	5	4	1.5	90	26.5653
Erdemli Beyazı	1	3	9	2.2	85	30.0003
Erdemli Beyazı	1	5	0	0	85	30.0003
Erdemli Beyazı	1	1.5	2	2	90	30.6576
Erdemli Beyazı	2	4.5	5	4.5	90	30.0003
Erdemli Beyazı	2	2	3	1.5	85	30.0003
Erdemli Beyazı	2	1	4	6	90	30.0003
Erdemli Beyazı	2	1	1	4	80	30.0003
Erdemli Beyazı	2	1	2	2.5	90	33.2113
Erdemli Siyahı	0	6.5	0	0	0	0
Erdemli Siyahı	0	6.3	0	0	0	0
Erdemli Siyahı	0	5	0	0	0	0
Erdemli Siyahı	0	3	0	0	0	0
Erdemli Siyahı	0	7	0	0	0	0
Erdemli Siyahı	0	5	0	0	0	0
Erdemli Siyahı	0	4	0	0	0	0
Erdemli Siyahı	0	5	0	0	0	0
Erdemli Siyahı	0	4	0	0	0	0
Erdemli Siyahı	1	3	0	0	100	18.4351
Erdemli Siyahı	1	2	0	0	90	26.5653
Erdemli Siyahı	1	2	0	0	80	26.5653
Erdemli Siyahı	2	2.5	2	6	100	90.0009
Erdemli Siyahı	2	3.5	5	5.5	100	90.0009
Erdemli Siyahı	2	3.5	1	5.5	100	90.0009
Erdemli Siyahı	2	1	1	2.5	100	90.0009
Erdemli Siyahı	2	2.5	5	4.5	100	90.0009
Erdemli Siyahı	2	0.5	9	4	100	90.0009
Erdemli Siyahı	2	1.5	1	3.5	100	90.0009
Erdemli Siyahı	2	1	1	3	100	90.0009
Erdemli Siyahı	2	2.5	5	4.5	100	90.0009
Erdemli Siyahı	2	1	5	3	100	90.0009
Karaisalı Beyazı	0	6	0	0	0	0
Karaisalı Beyazı	0	2	0	0	0	0
Karaisalı Beyazı	0	6	0	0	0	0
Karaisalı Beyazı	0	2.5	0	0	0	0
Karaisalı Beyazı	0	5.2	0	0	0	0
Karaisalı Beyazı	0	3.5	0	0	0	0
Karaisalı Beyazı	0	3	0	0	0	0
Karaisalı Beyazı	0	2.5	0	0	0	0
Karaisalı Beyazı	0	2.5	0	0	0	0
Karaisalı Beyazı	1	5.5	0	0	100	30.0003
Karaisalı Beyazı	1	4.3	0	0	90	33.2113
Karaisalı Beyazı	1	3.5	0	0	80	36.2716
Karaisalı Beyazı	1	2.5	0	0	85	35.6689
Karaisalı Beyazı	2	2	1	0.5	90	35.0619
Karaisalı Beyazı	2	2.5	1	2.5	95	39.2319
Karaisalı Beyazı	2	3	1	1	100	42.1309
Karaisalı Beyazı	2	2.5	2	1.2	100	39.2319
Karaisalı Siyahı	0	9.5	0	0	0	0
Karaisalı Siyahı	0	1	3	4	0	0
Karaisalı Siyahı	0	5	1	0.5	0	0
Karaisalı Siyahı	0	7	0	0	0	0
Karaisalı Siyahı	0	9	0	0	0	0
Karaisalı Siyahı	0	11	0	0	0	0
Karaisalı Siyahı	0	7	0	0	0	0
Karaisalı Siyahı	0	8	0	0	0	0
Karaisalı Siyahı	0	6	0	0	0	0
Karaisalı Siyahı	0	5	0	0	0	0
Karaisalı Siyahı	0	6	0	0	0	0
Karaisalı Siyahı	0	8	0	0	0	0
Karaisalı Siyahı	1	2.5	0	0	100	35.0619
Karaisalı Siyahı	1	2.5	0	0	100	30.0003
Karaisalı Siyahı	1	2.5	0	0	80	33.2113
Karaisalı Siyahı	2	1	2	0.5	80	42.1309
Karaisalı Siyahı	2	1	2	0.5	75	39.2319
Karaisalı Siyahı	2	1	2	0.5	100	39.2319
Karaisalı Siyahı	2	1	2	0.5	100	39.2319
Karaisalı Siyahı	2	1	2	0.5	100	42.1309
Karaisalı Siyahı	2	1	2	0.5	100	39.2319

## Sheet: Cutting
Genotip	Repetations	Rooted	non-rooted	Root number	Root length	Rooting Rate
Karaisalı Beyazı	1	0	10	0	0	0
Karaisalı Beyazı	2	0	10	0	0	0
Karaisalı Beyazı	3	0	10	0	0	0
Karaisalı Siyahı	1	1	9	4	6	10
Karaisalı Siyahı	2	2	8	2	6	20
Karaisalı Siyahı	3	1	9	1	7	10
Erdemli Beyazı	1	1	9	1	2	10
Erdemli Beyazı	2	0	10	0	0	0
Erdemli Beyazı	3	0	10	0	0	0
Erdemli Siyahı	1	0	10	0	0	0
Erdemli Siyahı	2	0	10	0	0	0
Erdemli Siyahı	3	0	10	0	0	0

## Sheet: Solid media rooting
Genotype	IBA concentrations	Plant length	Root number	Root length	Rooting rate
Karaisalı Beyazı	0	0.5	1	0.4	20
Karaisalı Beyazı	0	0.9	1	0.7	20
Karaisalı Beyazı	0	0.9	1	0.7	20
Karaisalı Beyazı	1	11	2	6.5	40
Karaisalı Beyazı	1	7	1	6.5	60
Karaisalı Beyazı	1	13	3	2.5	70
Karaisalı Beyazı	1	6.5	1	4	70
Karaisalı Beyazı	1	8	1	4.5	80
Karaisalı Beyazı	1	13.5	2	6.5	80
Karaisalı Beyazı	1	1.5	2	1	90
Karaisalı Beyazı	1	6	1	4.5	70
Karaisalı Beyazı	1	17.5	1	8.5	70
Karaisalı Beyazı	1	15.5	4	6.5	80
Karaisalı Beyazı	1	8.5	1	7	70
Karaisalı Beyazı	1	14	1	7	70
Karaisalı Beyazı	1	6	1	5.5	70
Karaisalı Beyazı	2	9	8	3.5	80
Karaisalı Beyazı	2	6	2	2.5	80
Karaisalı Beyazı	2	7.4	3	1.7	90
Karaisalı Beyazı	2	6.5	3	3	70
Karaisalı Beyazı	2	8	3	2.4	80
Karaisalı Beyazı	2	6	9	2	80
Karaisalı Beyazı	2	3	9	2	90
Karaisalı Beyazı	2	3.5	7	2	70
Karaisalı Beyazı	2	4.5	5	5	80
Karaisalı Beyazı	2	9	8	3.5	70
Karaisalı Beyazı	2	7	3	1.5	90
Karaisalı Beyazı	2	7.6	9	2.5	70
Karaisalı Beyazı	2	8	3	5.5	80
Karaisalı Beyazı	2	6.5	1	4	80
Karaisalı Beyazı	2	5.3	2	2.4	70
Karaisalı Beyazı	2	8.5	2	2.6	70
Karaisalı Beyazı	2	8.5	2	4	80
Karaisalı Beyazı	2	5	1	2	80
Karaisalı Beyazı	2	6	9	3.5	60
Karaisalı Siyahı	0	2	1	0.8	30
Karaisalı Siyahı	0	1	1	1	30
Karaisalı Siyahı	0	2	1	1.2	25
Karaisalı Siyahı	1	11	4	3	85
Karaisalı Siyahı	1	6.5	4	2	80
Karaisalı Siyahı	1	8	2	2	85
Karaisalı Siyahı	1	6.5	1	0.5	80
Karaisalı Siyahı	1	8	4	2	85
Karaisalı Siyahı	1	12	2	4.5	80
Karaisalı Siyahı	1	9.5	2	3	75
Karaisalı Siyahı	1	5.5	2	2	80
Karaisalı Siyahı	1	9.5	4	2.5	80
Karaisalı Siyahı	1	5	4	1.5	80
Karaisalı Siyahı	1	7	1	2.5	80
Karaisalı Siyahı	1	8	4	2.5	80
Karaisalı Siyahı	1	6.5	6	1	80
Karaisalı Siyahı	1	9	4	4.5	80
Karaisalı Siyahı	1	5.5	6	1.5	80
Karaisalı Siyahı	1	6	4	2.5	80
Karaisalı Siyahı	1	9.5	9	1.5	80
Karaisalı Siyahı	1	8	4	3	80
Karaisalı Siyahı	1	6	1	3	80
Karaisalı Siyahı	1	13	5	4	80
Karaisalı Siyahı	1	9.5	6	4	80
Karaisalı Siyahı	1	12	4	3	80
Karaisalı Siyahı	2	9	11	2	20
Karaisalı Siyahı	2	12	4	3	15
Karaisalı Siyahı	2	9	10	2.5	20
Karaisalı Siyahı	2	10	4	3	17
Karaisalı Siyahı	2	11	6	2.5	18
Karaisalı Siyahı	2	8.5	6	2	20
Karaisalı Siyahı	2	8.5	5	2.5	20
Karaisalı Siyahı	2	10.5	6	3	20
Karaisalı Siyahı	2	6.5	3	2	20
Karaisalı Siyahı	2	10.5	6	3.5	15
Karaisalı Siyahı	2	6	1	1	15
Karaisalı Siyahı	2	7	7	2	20
Karaisalı Siyahı	2	8	4	2	20
Karaisalı Siyahı	2	7.5	4	2.5	20
Karaisalı Siyahı	2	9.5	7	3	20
Karaisalı Siyahı	2	8	6	2.5	20
Karaisalı Siyahı	2	6.5	3	2.5	20
Karaisalı Siyahı	2	11	6	2	20
Karaisalı Siyahı	2	10.5	7	2.5	20
Karaisalı Siyahı	2	11.5	4	2	20
Karaisalı Siyahı	2	9	5	2	20
Karaisalı Siyahı	2	9	6	4	20
Erdemli Beyazı	0	2	1	1.2	60
Erdemli Beyazı	0	2	1	1.5	65
Erdemli Beyazı	1	12	1	5.5	60
Erdemli Beyazı	1	7.5	1	3	65
Erdemli Beyazı	1	9.5	1	6	60
Erdemli Beyazı	1	4	2	0.8	60
Erdemli Beyazı	1	8.5	1	4.5	65
Erdemli Beyazı	1	3	1	2.2	55
Erdemli Beyazı	1	13	4	6.5	65
Erdemli Beyazı	1	11	4	4.5	65
Erdemli Beyazı	1	8.5	2	5	65
Erdemli Beyazı	1	7.5	1	5.5	65
Erdemli Beyazı	1	6	2	4.5	65
Erdemli Beyazı	1	13.5	2	6	65
Erdemli Beyazı	1	8	1	5.5	65
Erdemli Beyazı	1	12	1	6.5	65
Erdemli Beyazı	1	4.2	1	3.3	65
Erdemli Beyazı	1	6	1	5	65
Erdemli Beyazı	1	13	1	6	65
Erdemli Beyazı	1	7.5	1	5.5	65
Erdemli Beyazı	1	5.5	2	4	65
Erdemli Beyazı	2	11.5	1	4	80
Erdemli Beyazı	2	9.5	1	2	85
Erdemli Beyazı	2	5.5	1	4	80
Erdemli Beyazı	2	13	1	5.5	75
Erdemli Beyazı	2	2.5	1	2	80
Erdemli Beyazı	2	4.5	1	3	80
Erdemli Siyahı	0	3	0	0	0
Erdemli Siyahı	0	2	0	0	0
Erdemli Siyahı	0	1.5	0	0	0
Erdemli Siyahı	0	2.2	0	0	0
Erdemli Siyahı	0	1	0	0	0
Erdemli Siyahı	0	2.5	0	0	0
Erdemli Siyahı	0	1	0	0	0
Erdemli Siyahı	0	2.2	0	0	0
Erdemli Siyahı	0	2.7	0	0	0
Erdemli Siyahı	0	1.2	0	0	0
Erdemli Siyahı	1	6	2	3	50
Erdemli Siyahı	1	4	1	3	55
Erdemli Siyahı	1	9.5	1	8	50
Erdemli Siyahı	1	6	1	4	50
Erdemli Siyahı	1	5	2	4	50
Erdemli Siyahı	1	6	5	1	50
Erdemli Siyahı	1	5	3	3	50
Erdemli Siyahı	1	5	1	4	50
Erdemli Siyahı	1	2	2	1	50
Erdemli Siyahı	1	2	3	1.5	60
Erdemli Siyahı	2	6.5	2	3	65
Erdemli Siyahı	2	12	11	4	65
Erdemli Siyahı	2	5.5	2	0.5	65
Erdemli Siyahı	2	6.5	1	0.5	60
Erdemli Siyahı	2	2.5	1	0.5	60
Erdemli Siyahı	2	4.5	2	0.5	60
Erdemli Siyahı	2	5.5	5	2	60
Erdemli Siyahı	2	14	7	9	60
Erdemli Siyahı	2	5	9	2.5	65
Erdemli Siyahı	2	7	5	2.5	60
Erdemli Siyahı	2	6	7	4	60
Erdemli Siyahı	2	12	2	6	60
Erdemli Siyahı	2	6	1	4	65

## Sheet: Solid micropropagation kardeş
Genotype	BAP Concentrations	Plant Lenght	Multiplication coefficients
Erdemli Beyazı	0	0.2	1
Erdemli Beyazı	0	0.2	1
Erdemli Beyazı	0	0.2	1
Erdemli Beyazı	0	0.3	1
Erdemli Beyazı	0	0.2	1
Erdemli Beyazı	0	0.2	1
Erdemli Beyazı	0	0.4	1
Erdemli Beyazı	0	0.2	1
Erdemli Beyazı	0	0.5	1
Erdemli Beyazı	0	0.2	1
Erdemli Beyazı	1	2.16667	2.33333
Erdemli Beyazı	1	1.9	2.66667
Erdemli Beyazı	1	2	2.33333
Erdemli Beyazı	1	1.66667	2.33333
Erdemli Beyazı	1	2	1
Erdemli Beyazı	1	1.36667	3
Erdemli Beyazı	1	1.56667	1.33333
Erdemli Beyazı	1	1.3	2.66667
Erdemli Beyazı	1	0.833333	1.66667
Erdemli Beyazı	1	1.16667	1.33333
Erdemli Beyazı	2	2.16667	5
Erdemli Beyazı	2	2	9.66667
Erdemli Beyazı	2	2.1	4.66667
Erdemli Beyazı	2	2.23333	6
Erdemli Beyazı	2	1.33333	4.66667
Erdemli Beyazı	2	2	1.66667
Erdemli Beyazı	2	1	4.66667
Erdemli Beyazı	2	1.16667	2.33333
Erdemli Beyazı	2	1.56667	4.33333
Erdemli Beyazı	2	1.83333	3.66667
Erdemli Siyahı	0	1.5	1
Erdemli Siyahı	0	1.5	1
Erdemli Siyahı	0	1.6	1
Erdemli Siyahı	0	1.5	1
Erdemli Siyahı	0	0.3	1
Erdemli Siyahı	1	1.76667	2
Erdemli Siyahı	1	2.33333	10.3333
Erdemli Siyahı	1	2.33333	5.66667
Erdemli Siyahı	1	2.26667	4.33333
Erdemli Siyahı	1	2	4
Erdemli Siyahı	1	1.66667	2
Erdemli Siyahı	1	2.33333	1.66667
Erdemli Siyahı	1	2.26667	5
Erdemli Siyahı	1	1.8	2.33333
Erdemli Siyahı	1	2.1	1.66667
Erdemli Siyahı	1	1.33333	3.66667
Erdemli Siyahı	2	1.23333	4.33333
Erdemli Siyahı	2	1.13333	3.33333
Erdemli Siyahı	2	1.4	5
Erdemli Siyahı	2	1.4	6.33333
Erdemli Siyahı	2	1.8	7
Erdemli Siyahı	2	2.16667	7.33333
Erdemli Siyahı	2	1.16667	2.33333
Erdemli Siyahı	2	1.5	5
Erdemli Siyahı	2	1.33333	3
Erdemli Siyahı	2	1.06667	6.33333
Erdemli Siyahı	2	1.16667	4
Erdemli Siyahı	2	1	7
Karaisalı Beyazı	0	0.5	1
Karaisalı Beyazı	0	0.5	1
Karaisalı Beyazı	1	0.5	1
Karaisalı Beyazı	1	1.5	1
Karaisalı Beyazı	1	0.5	1
Karaisalı Beyazı	1	1.5	1
Karaisalı Beyazı	1	0.5	1
Karaisalı Beyazı	2	1.1	4
Karaisalı Beyazı	2	1.16667	3.33333
Karaisalı Beyazı	2	1.26667	2.66667
Karaisalı Beyazı	2	1.83333	4.33333
Karaisalı Beyazı	2	1.16667	1.66667
Karaisalı Beyazı	2	1.43333	2.66667
Karaisalı Beyazı	2	1.5	6
Karaisalı Beyazı	2	1.5	5.66667
Karaisalı Beyazı	2	1.23333	2
Karaisalı Beyazı	2	1.66667	3.33333
Karaisalı Beyazı	2	1.93333	3.33333
Karaisalı Beyazı	2	1.66667	3
Karaisalı Beyazı	2	1.93333	2.66667
Karaisalı Beyazı	2	1.33333	2.33333
Karaisalı Beyazı	2	1.4	1.66667
Karaisalı Beyazı	2	1.83333	3.33333
Karaisalı Siyahı	0	1.2	1
Karaisalı Siyahı	0	1.2	1
Karaisalı Siyahı	0	2	1
Karaisalı Siyahı	0	2.5	1
Karaisalı Siyahı	0	1	1
Karaisalı Siyahı	0	1	1
Karaisalı Siyahı	0	1	1
Karaisalı Siyahı	0	0.3	1
Karaisalı Siyahı	0	0.5	1
Karaisalı Siyahı	0	1.8	1
Karaisalı Siyahı	1	1.75	6.5
Karaisalı Siyahı	1	2.35	4.5
Karaisalı Siyahı	1	1.4	4.5
Karaisalı Siyahı	1	1.5	2.5
Karaisalı Siyahı	1	1.5	2.5
Karaisalı Siyahı	1	1.75	4.5
Karaisalı Siyahı	1	1.6	2.5
Karaisalı Siyahı	1	1.7	1.5
Karaisalı Siyahı	1	1.5	1.5
Karaisalı Siyahı	1	1.05	3
Karaisalı Siyahı	1	1	1.5
Karaisalı Siyahı	1	1.7	2.5
Karaisalı Siyahı	1	1.55	2.5
Karaisalı Siyahı	1	1.65	2
Karaisalı Siyahı	1	1.85	3.5
Karaisalı Siyahı	1	1.5	3
Karaisalı Siyahı	1	0.65	1.5
Karaisalı Siyahı	1	1.25	1.5
Karaisalı Siyahı	1	1.25	2.5
Karaisalı Siyahı	1	1.15	2.5
Karaisalı Siyahı	1	1.65	2.5
Karaisalı Siyahı	1	1.4	2.5
Karaisalı Siyahı	1	1.3	2
Karaisalı Siyahı	1	2	3.5
Karaisalı Siyahı	1	1.25	1
Karaisalı Siyahı	1	1	1.5
Karaisalı Siyahı	2	2.75	1.5
Karaisalı Siyahı	2	1.85	8
Karaisalı Siyahı	2	2.15	5.5
Karaisalı Siyahı	2	1.75	3.5
Karaisalı Siyahı	2	1	4
Karaisalı Siyahı	2	1.65	3
Karaisalı Siyahı	2	1.85	5
Karaisalı Siyahı	2	1.25	4
Karaisalı Siyahı	2	1	1.5
Karaisalı Siyahı	2	1.25	3.5
Karaisalı Siyahı	2	1.6	3.5
Karaisalı Siyahı	2	2	9.5
Karaisalı Siyahı	2	2.25	8
Karaisalı Siyahı	2	2.5	9
Karaisalı Siyahı	2	1.6	5.5
Karaisalı Siyahı	2	1.65	8
Karaisalı Siyahı	2	1.75	7.5
Karaisalı Siyahı	2	1.25	6.5
Karaisalı Siyahı	2	2.25	12.5
Karaisalı Siyahı	2	2.25	5
Karaisalı Siyahı	2	1.25	4
Karaisalı Siyahı	2	1.6	1.5
Karaisalı Siyahı	2	1.6	5.5
Karaisalı Siyahı	2	1.5	3
Karaisalı Siyahı	2	2.15	3.5
Karaisalı Siyahı	2	1.7	3
